# Supplementary material for: Genome-Wide Identification and Expression Analysis of Calmodulin-Like Gene Family in Paspalums vaginatium Revealed Their Role in Response to Salt and Cold Stress
Source: MDPI journal article supplement (doi:10.3390/cimb45020109), 2023-02-16
Supplement: s1 [file s1]

# Supplementary Information

Genome-Wide Identification and Expression Analysis of  
Calmodulin-like Gene Family in *Paspalum vaginatum* Revealed their Role  
in Response to Salt and Cold Stress

Meizhen Yang *et al.*

## **Contents:**

Supplementary Figures (Figure S1 – S4)

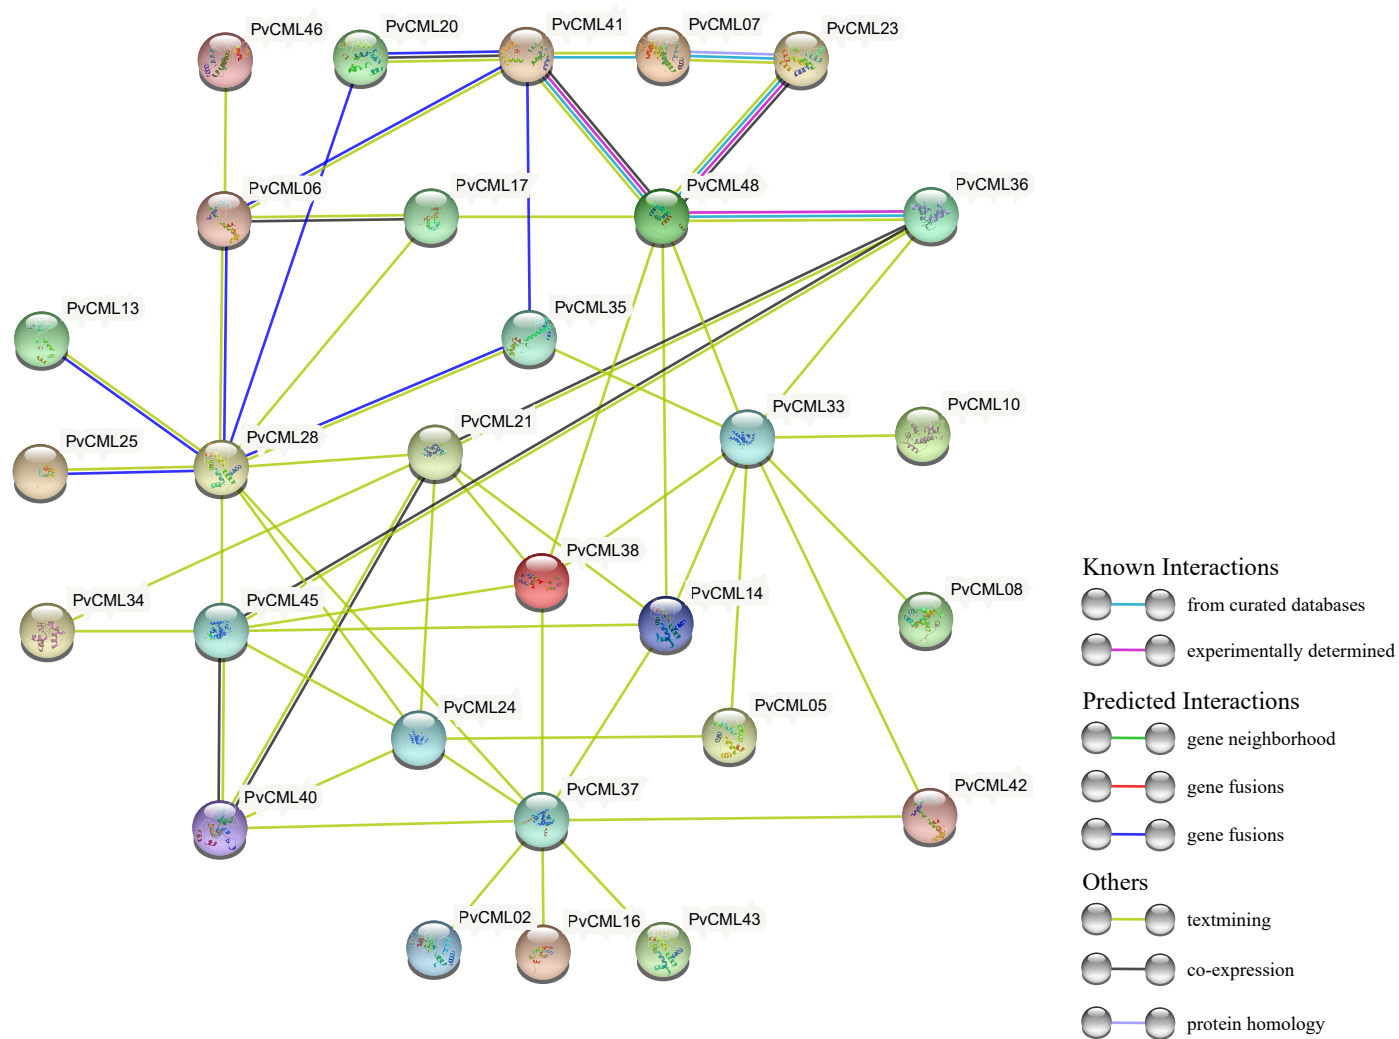

Figure S1. Predicted protein-protein interaction network (PPI) of PvCMLs

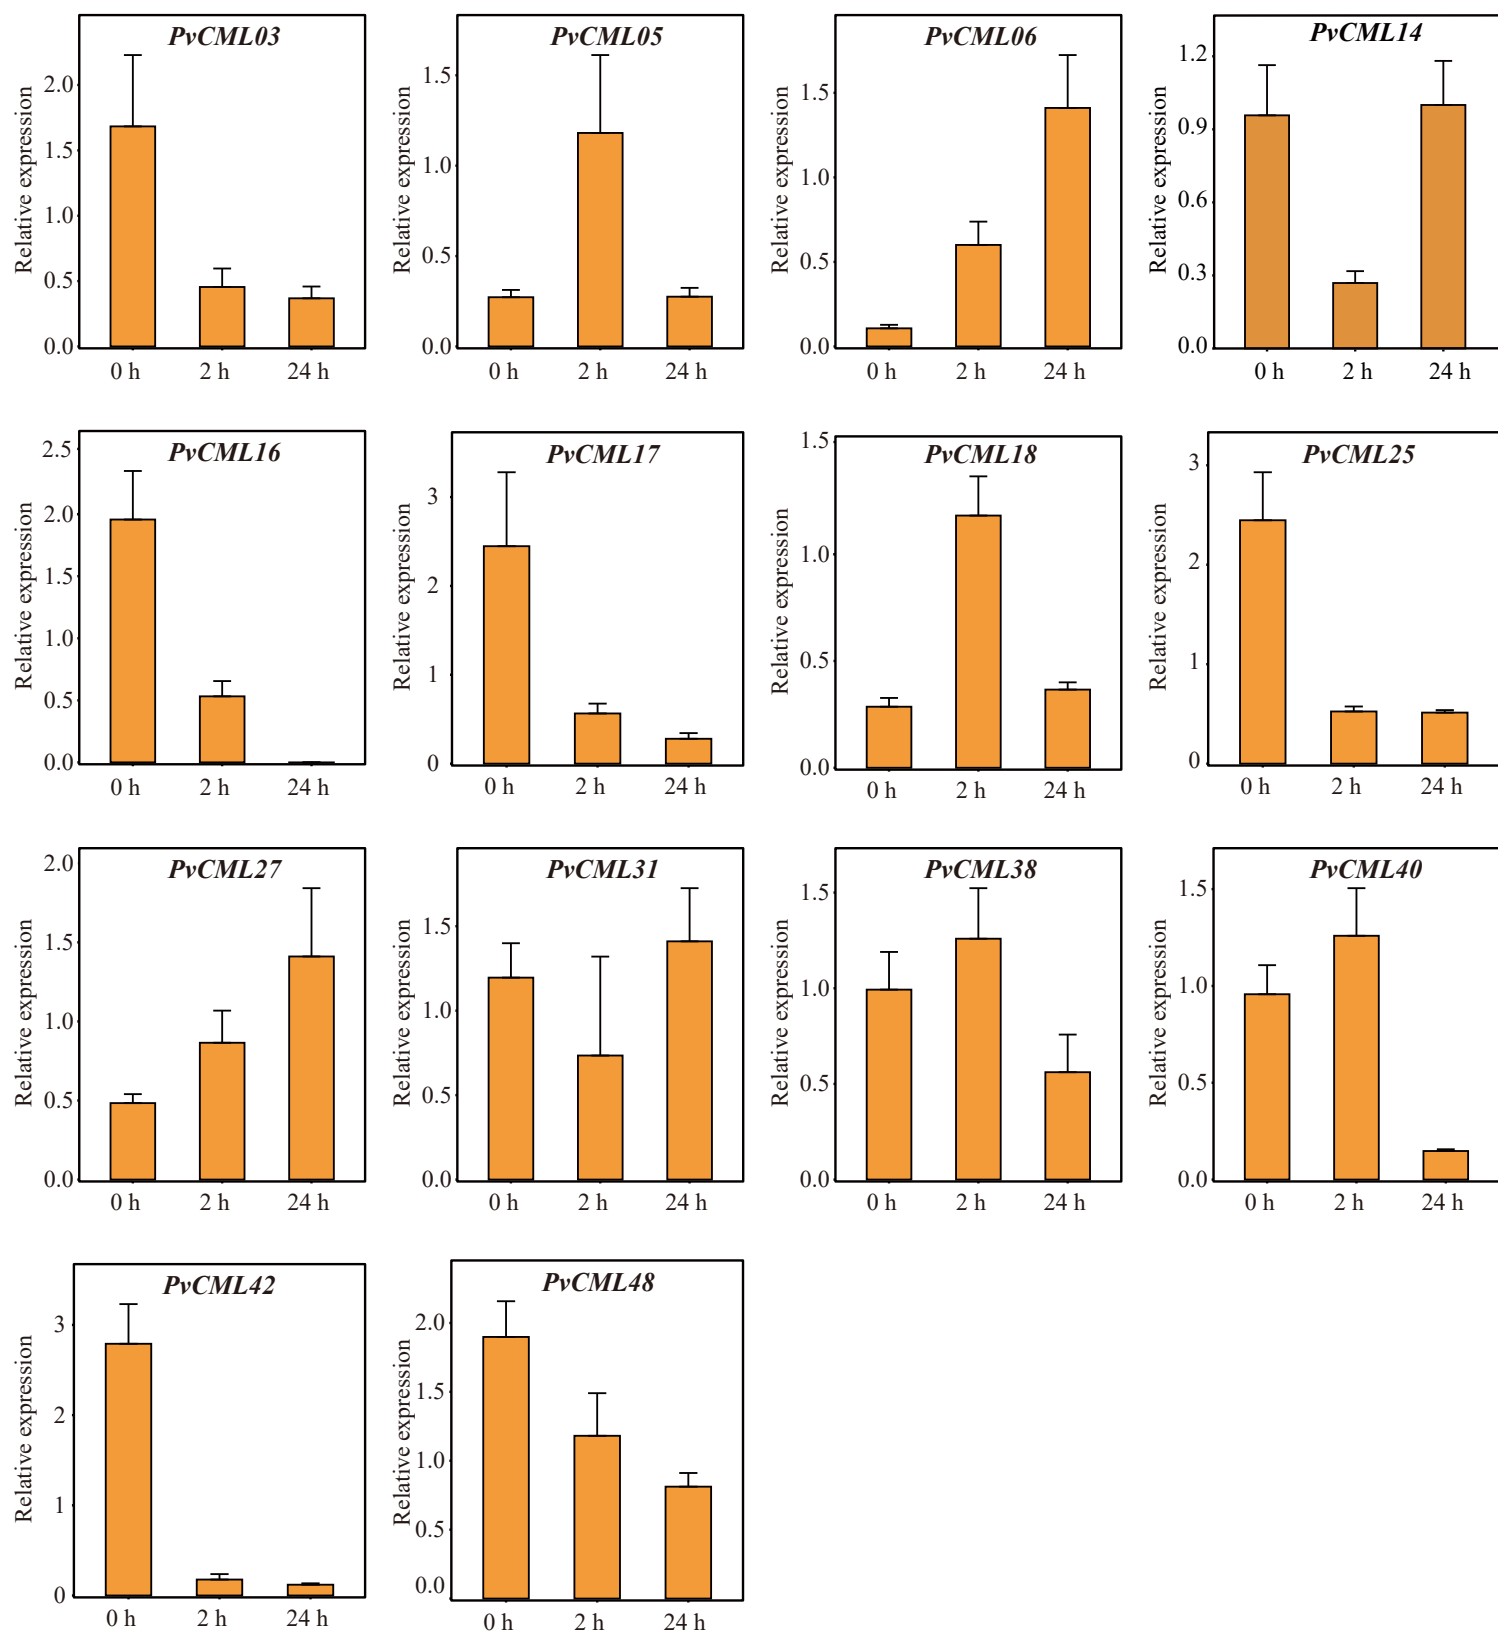

Figure S2. qRT-PCR results of 14 PvCMLs under salt stress

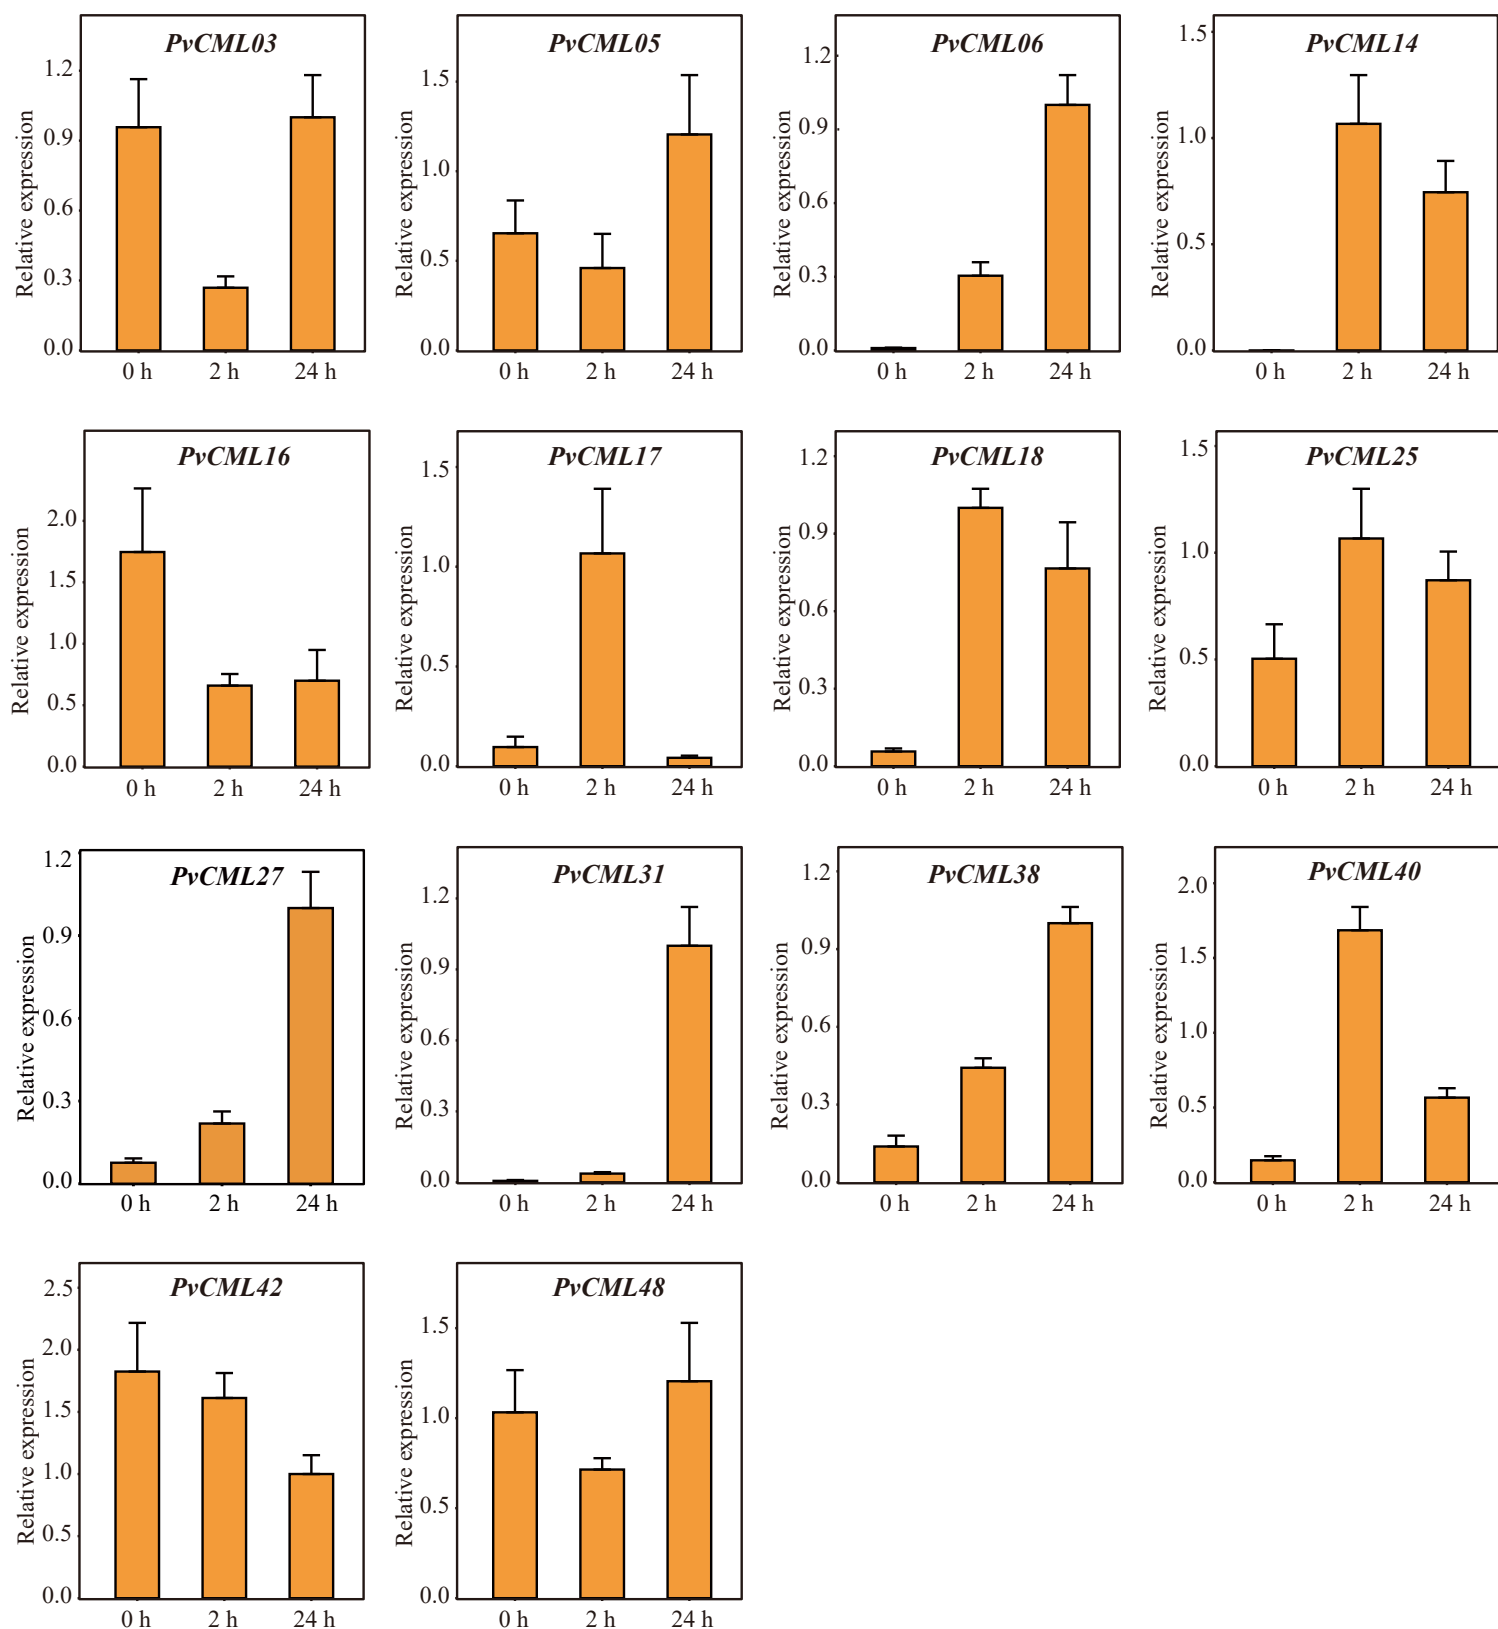

Figure S3. qRT-PCR results of 14 PvCMLs under cold stress

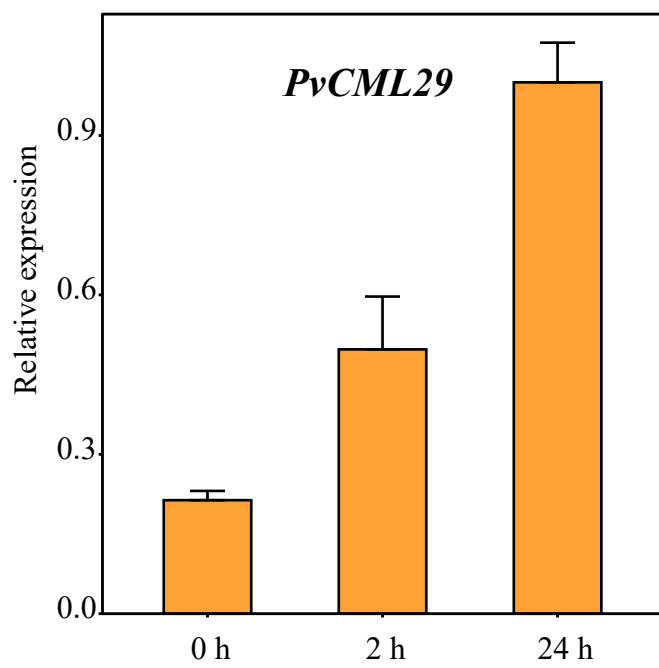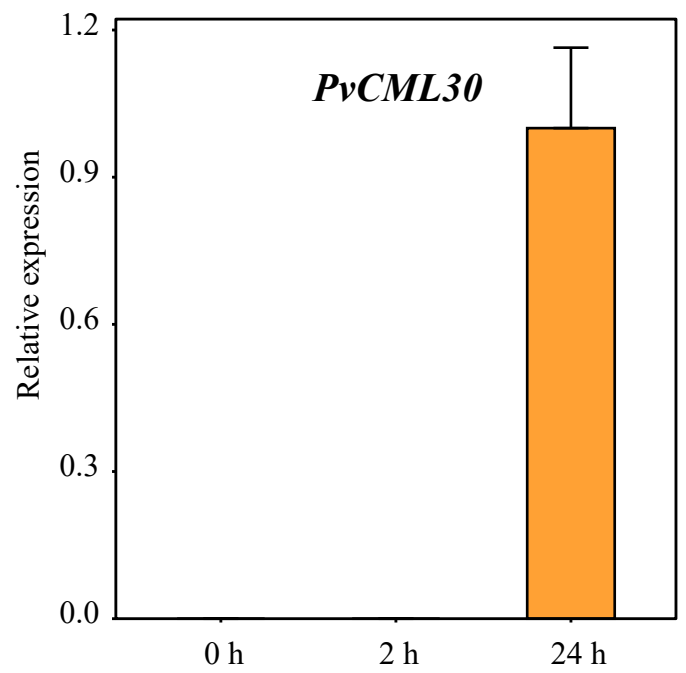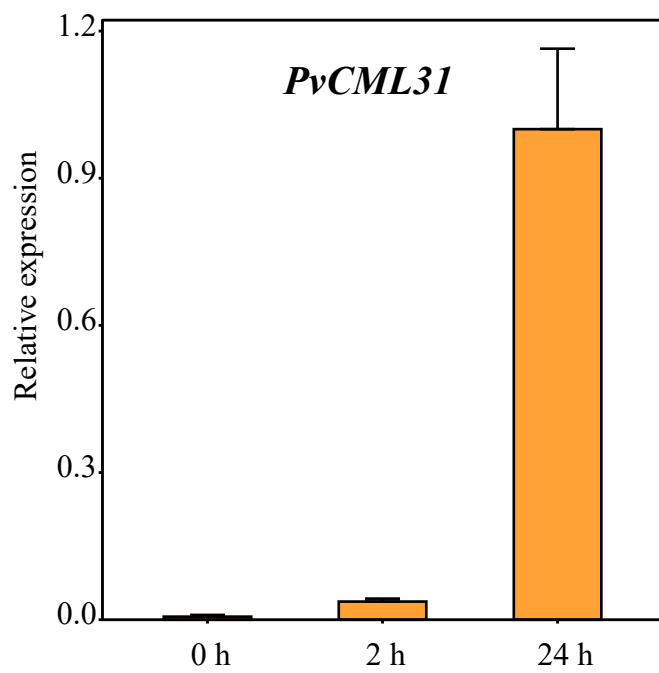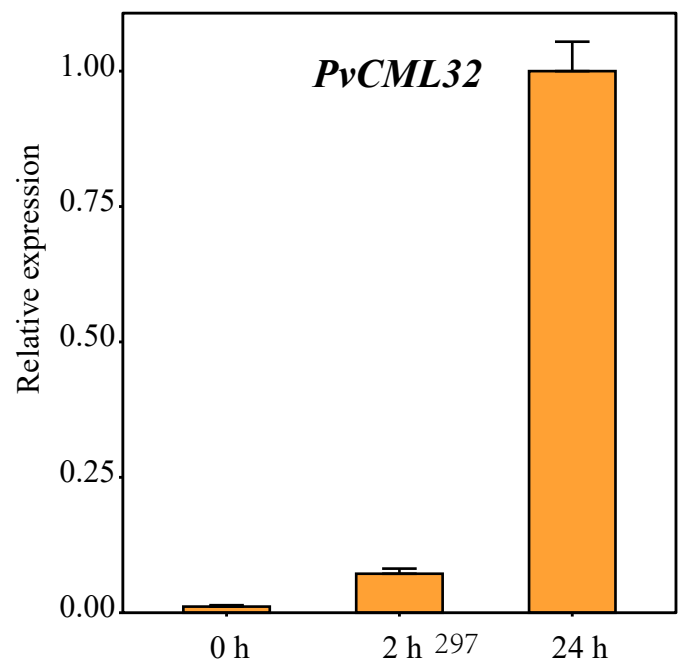

Figure S4. RT-qPCR results of *PvCML29-32* under cold stress
